# Supplementary material
Source: publisher figshare collection journal article supplement (https://acs.figshare.com/ndownloader/files/4949107)
Supplement: Supplementary file 1 [file 4949107]

**Supporting information**

**for**

**Enhancing the Mobilization of Native Phosphorous in the Mung Bean Rhizosphere Using ZnO Nanoparticles Synthesized by Soil Fungi**

Ramesh Raliya,<sup>†</sup> Jagadish Chandra Tarafdar,<sup>‡</sup> and Pratim Biswas<sup>\*,†</sup>

<sup>†</sup>Washington University in St. Louis, St. Louis, Missouri 63130, United States

<sup>‡</sup>Central Arid Zone Research Institute, Jodhpur 342003, India

\*Corresponding Author

Phone: +1 314-936-5548. Fax: +1 314-935-5464.

Email: [pbiswas@wustl.edu](mailto:pbiswas@wustl.edu)

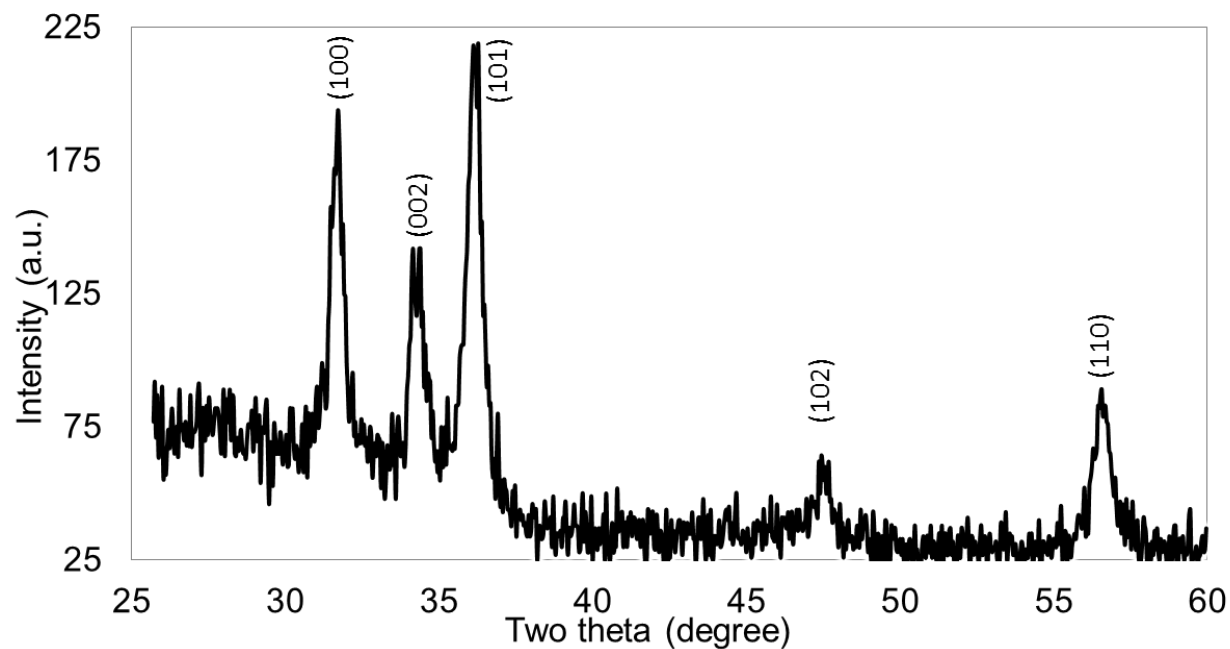

**Fig. S1.** X-Ray diffraction analyses of synthesized ZnO nanoparticles, showing five distinct peaks for zincite crystal (100, 002, 101, 102, 110) of zinc crystal nature.

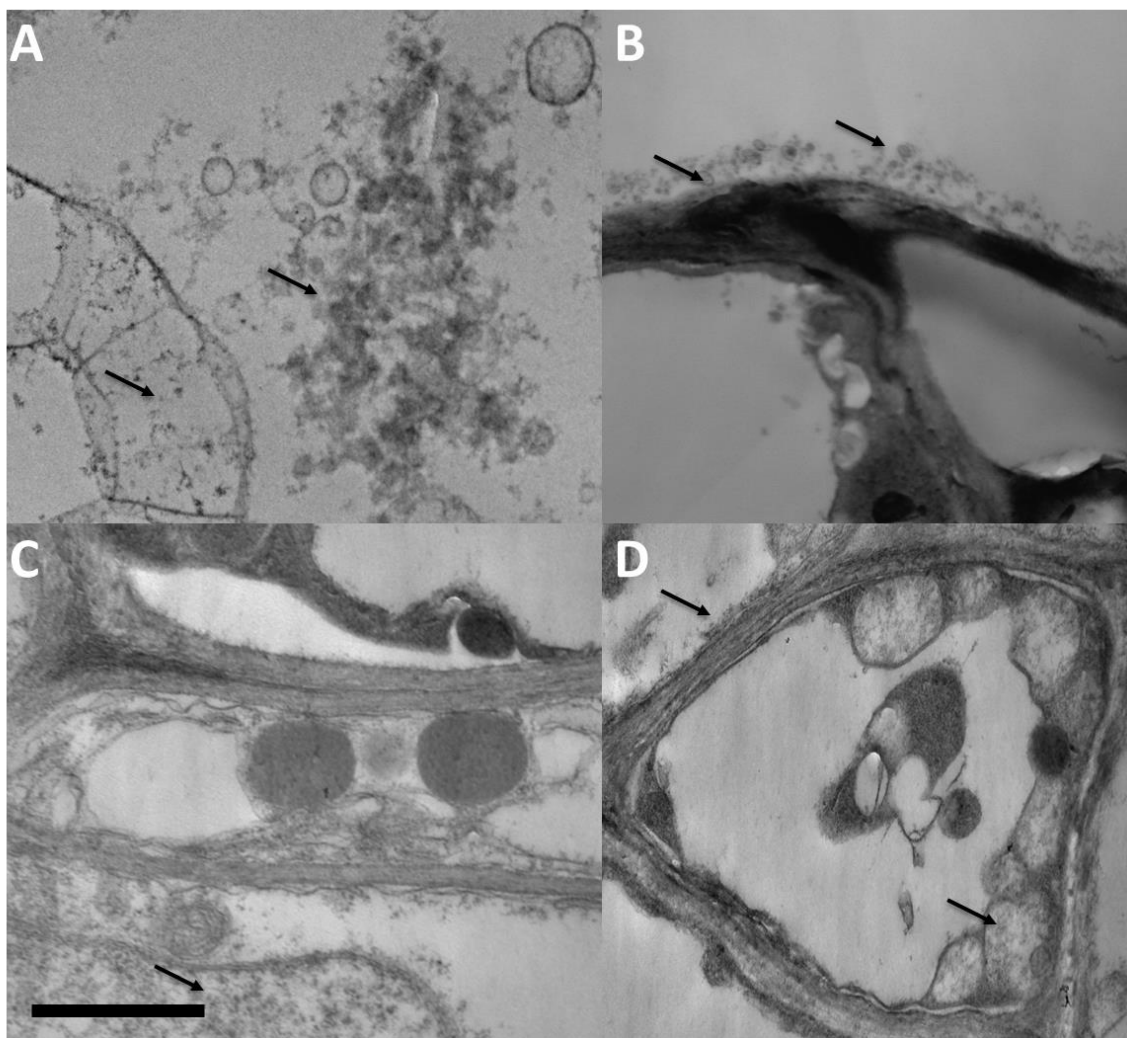

**Fig. S2.** Fate and transport of ZnO nanoparticles in mung bean plants. TEM micrograph of the stem (A), root (B), leaf (C) and seeds (D). Scale bar equals to 1  $\mu$ .

**Isolation of Fungi.** The soil fungus, *Aspergillus fumigatus* TFR-8 (NCBI GenBank Accession No. JQ675291) was isolated rhizospheric soil of mung bean. Isolation of fungi was carried out by plating the inoculum on Martin Rose Bengal Agar medium (Hi-Media, India, pH 7.2) after serial dilutions of the soil sample. Inoculated plates were incubated at 28°C for 72 h in BOD incubator. Individual fungal colonies were picked and further purified by sub-culturing on Potato Dextrose Agar media.

**Molecular Characterization of Fungal Isolate.** Molecular level identification of fungus strain was carried out by partial DNA sequencing of 18S and 28S rRNA and complete sequence of Internal Transcribed Sequence 1 (ITS-1), Internal Transcribed Sequence 2 (ITS-2) and 5.8S rRNA gene (Complex of -18S-ITS1-5.8S-ITS2-28S-) was done using universal primer ITS1 (5'-TCCGTAGGTGAACCTGCG-3') and ITS 4 (5'-TCCTCCGCTTATTGATATGC-3'). The rRNA sequence was submitted to GenBank of National Centre for Biotechnological Information (NCBI).

**Table S1.** Effect of ZnO NPs on phenological parameters of mung bean

| Treatment         | Shoot length<br>(cm) | Root length<br>(cm) | Root area<br>(cm <sup>2</sup> ) | Root diameter<br>(cm) | Root nodules<br>(No.) |
|-------------------|----------------------|---------------------|---------------------------------|-----------------------|-----------------------|
| Control           | 47.0                 | 22.4                | 16.5                            | 0.4                   | 11.7                  |
| Bulk ZnO          | 58.7                 | 24.6                | 21.9                            | 0.4                   | 17.7                  |
| Nano ZnO          | 62.4                 | 29.1                | 25.3                            | 0.4                   | 18.6                  |
| LSD (p =<br>0.05) | 0.23                 | 0.09                | 0.07                            | NS                    | 1.39                  |

**Table S2.** Effect of ZnO NPs on total chlorophyll and total soluble leaf protein content of mung bean

| Treatment          | Total chlorophyll ( $\mu\text{g g}^{-1}$ ) | Total soluble leaf protein ( $\text{mg kg}^{-1}$ ) |
|--------------------|--------------------------------------------|----------------------------------------------------|
| Control            | 8.4                                        | 52.3                                               |
| Bulk ZnO           | 9.1                                        | 58.5                                               |
| Nano ZnO           | 11.3                                       | 65.4                                               |
| LSD ( $p = 0.05$ ) | 0.18                                       | 0.5                                                |

**Table S3** Effect of ZnO NPs on microbial population of mung bean rhizosphere

| Treatment      | Bacteria (cfu $\times 10^{-6}$ ) | Fungi (cfu $\times 10^{-4}$ ) | Actinomycetes (cfu $\times 10^{-3}$ ) |
|----------------|----------------------------------|-------------------------------|---------------------------------------|
| Control        | 38.7                             | 21.0                          | 13.7                                  |
| Bulk ZnO       | 40.0                             | 23.0                          | 13.7                                  |
| Nano ZnO       | 45.7                             | 27.0                          | 16.0                                  |
| LSD (p = 0.05) | 0.08                             | 0.04                          | 0.05                                  |

**Table S4.** Effect of ZnO NPs on enzymatic activity in the mung bean rhizosphere

| Treatment      | Acid phosphatase<br>(EU×10 <sup>-4</sup> ) | Alkaline phosphatase<br>(EU×10 <sup>-4</sup> ) | Phytase<br>(EU×10 <sup>-2</sup> ) | Dehydrogenase<br>(pkat g <sup>-1</sup> ) |
|----------------|--------------------------------------------|------------------------------------------------|-----------------------------------|------------------------------------------|
| Control        | 5.2                                        | 4.3                                            | 2.5                               | 5.7                                      |
| Bulk ZnO       | 7.5                                        | 6.9                                            | 4.0                               | 8.2                                      |
| Nano ZnO       | 10.3                                       | 8.3                                            | 5.2                               | 10.5                                     |
| LSD (p = 0.05) | 0.09                                       | 0.04                                           | 0.04                              | 0.14                                     |



**Table S5.** Effect of ZnO NPs on grain yield and dry biomass of mung bean

| Treatment      | Grain yield (kg ha <sup>-1</sup> ) | Dry biomass (kg ha <sup>-1</sup> ) |
|----------------|------------------------------------|------------------------------------|
| Control        | 944                                | 1716                               |
| Bulk ZnO       | 965                                | 2035                               |
| Nano ZnO       | 1005                               | 2354                               |
| LSD (p = 0.05) | 13.8                               | 162.4                              |

**Table S6.** Effect of ZNO nanoparticles on available P in the rhizosphere and total plant P of mung bean

| Treatment      | Olsen P (mg kg <sup>-1</sup> ) | Plant P (mg kg <sup>-1</sup> ) |
|----------------|--------------------------------|--------------------------------|
| Control        | 33.7                           | 978.2                          |
| Ordinary Zn    | 26.5                           | 998.2                          |
| Nano Zn        | 24.6                           | 1084.4                         |
| LSD (p = 0.05) | 0.3                            | 1.37                           |
